# Supplementary material for: MiRNA Profiles of Extracellular Vesicles Secreted by Mesenchymal Stromal Cells—Can They Predict Potential Off-Target Effects?
Source: PubMed Central journal article supplement (PMC7565205; doi:10.3390/biom10091353), 2020-09-22
Supplement: biomolecules-10-01353-s001.pdf [file biomolecules-10-01353-s001.pdf]

**Table S1.** Analyzed miRNAs and their expression values. EV samples isolated from CB-MSCs are indicated as CB\_MSC\_1-4 and EV samples isolated from AT-MSCs are indicated as AT\_MSC\_1-4.

| MiRNA ID            | Reference  | Ctcorr value |          |          |          |          |          |          |          |
|---------------------|------------|--------------|----------|----------|----------|----------|----------|----------|----------|
|                     |            | CB_MSC_1     | CB_MSC_2 | CB_MSC_3 | CB_MSC_4 | AT_MSC_1 | AT_MSC_2 | AT_MSC_3 | AT_MSC_4 |
| hsa-miR-7-5p        | YP00205877 | 32,23        | 35,00    | 33,98    | 35,00    | 35,00    | 34,47    | 35,00    | 34,05    |
| hsa-miR-217         | YP00204010 | 35,00        | 35,00    | 35,00    | 35,00    | 35,00    | 35,00    | 35,00    | 35,00    |
| hsa-miR-337-5p      | YP00204391 | 30,34        | 34,02    | 31,99    | 31,72    | 32,92    | 32,71    | 33,96    | 34,19    |
| hsa-miR-328-3p      | YP00204364 | 29,41        | 32,04    | 30,74    | 31,64    | 31,42    | 31,66    | 32,45    | 32,65    |
| hsa-miR-374b-3p     | YP00205917 | 35,00        | 35,00    | 35,00    | 35,00    | 35,00    | 35,00    | 35,00    | 35,00    |
| hsa-miR-143-3p      | YP00205992 | 25,62        | 28,80    | 27,53    | 29,06    | 28,71    | 26,62    | 28,54    | 27,87    |
| hsa-miR-623         | YP00204019 | 35,00        | 35,00    | 35,00    | 35,00    | 35,00    | 35,00    | 35,00    | 35,00    |
| hsa-miR-520c-3p     | YP00204497 | 35,00        | 35,00    | 35,00    | 35,00    | 35,00    | 35,00    | 35,00    | 35,00    |
| hsa-miR-557         | YP00204346 | 35,00        | 35,00    | 35,00    | 35,00    | 35,00    | 35,00    | 35,00    | 35,00    |
| hsa-miR-218-5p      | YP00206034 | 31,02        | 35,00    | 33,11    | 34,61    | 31,70    | 29,71    | 31,85    | 30,39    |
| hsa-miR-136-5p      | YP00204779 | 27,71        | 30,00    | 28,71    | 28,37    | 30,71    | 28,95    | 31,77    | 29,52    |
| hsa-miR-127-5p      | YP00204161 | 30,89        | 34,28    | 32,79    | 32,68    | 32,70    | 31,88    | 34,48    | 33,38    |
| hsa-miR-140-5p      | YP00204540 | 30,00        | 29,87    | 31,03    | 33,13    | 32,07    | 30,88    | 33,38    | 31,52    |
| hsa-miR-31-3p       | YP00204079 | 27,77        | 29,75    | 29,02    | 31,07    | 29,74    | 28,83    | 30,05    | 29,52    |
| hsa-miR-20b-3p      | YP00204569 | 35,00        | 35,00    | 35,00    | 35,00    | 35,00    | 35,00    | 35,00    | 35,00    |
| hsa-miR-325         | YP00204464 | 35,00        | 35,00    | 35,00    | 35,00    | 35,00    | 35,00    | 35,00    | 35,00    |
| hsa-miR-509-3-5p    | YP00204503 | 35,00        | 35,00    | 35,00    | 35,00    | 35,00    | 35,00    | 35,00    | 35,00    |
| hsa-miR-210-3p      | YP00204333 | 29,61        | 31,33    | 32,66    | 29,99    | 29,31    | 28,49    | 30,74    | 29,37    |
| hsa-miR-199b-5p     | YP00204152 | 26,58        | 31,90    | 28,18    | 28,77    | 28,22    | 26,99    | 29,44    | 28,08    |
| hsa-miR-194-5p      | YP00204080 | 32,90        | 35,00    | 35,00    | 35,00    | 34,46    | 32,64    | 35,00    | 35,00    |
| hsa-let-7g-5p       | YP00204565 | 26,94        | 30,01    | 28,05    | 31,64    | 29,38    | 27,88    | 30,21    | 28,74    |
| hsa-miR-203a-3p     | YP00205914 | 35,00        | 35,00    | 35,00    | 35,00    | 35,00    | 34,39    | 35,00    | 35,00    |
| hsa-miR-181a-3p     | YP00204110 | 34,04        | 34,44    | 35,00    | 35,00    | 35,00    | 33,38    | 35,00    | 33,94    |
| hsa-miR-137         | YP00206062 | 29,14        | 30,98    | 29,84    | 33,53    | 32,22    | 30,92    | 33,54    | 31,54    |
| hsa-miR-551b-3p     | YP00204067 | 33,65        | 35,00    | 35,00    | 34,15    | 35,00    | 35,00    | 35,00    | 35,00    |
| hsa-miR-524-3p      | YP00204030 | 35,00        | 35,00    | 35,00    | 35,00    | 35,00    | 35,00    | 35,00    | 35,00    |
| hsa-miR-486-5p      | YP00204001 | 31,83        | 35,00    | 32,02    | 32,10    | 34,38    | 35,00    | 35,00    | 35,00    |
| hsa-miR-329-3p      | YP00206052 | 31,35        | 33,19    | 33,08    | 33,46    | 35,00    | 33,56    | 35,00    | 33,68    |
| hsa-miR-487b-3p     | YP00204489 | 30,89        | 32,74    | 31,82    | 32,67    | 33,11    | 32,20    | 35,00    | 33,44    |
| hsa-miR-138-5p      | YP00206078 | 30,78        | 31,35    | 31,89    | 27,59    | 27,39    | 26,57    | 29,77    | 29,51    |
| hsa-miR-191-5p      | YP00204306 | 26,13        | 28,68    | 27,99    | 28,09    | 28,23    | 27,77    | 29,47    | 29,38    |
| hsa-miR-378a-3p     | YP00205946 | 33,63        | 35,00    | 35,00    | 35,00    | 35,00    | 30,53    | 32,25    | 33,56    |
| hsa-miR-103a-3p     | YP00204063 | 24,68        | 28,44    | 27,04    | 27,69    | 28,97    | 27,21    | 29,61    | 28,98    |
| hsa-miR-890         | YP00205859 | 35,00        | 35,00    | 35,00    | 35,00    | 35,00    | 35,00    | 35,00    | 35,00    |
| hsa-miR-423-5p      | YP00205624 | 28,86        | 32,39    | 30,40    | 29,91    | 29,79    | 29,68    | 30,06    | 31,42    |
| hsa-miR-221-3p      | YP00204532 | 23,94        | 26,49    | 24,91    | 27,52    | 24,95    | 24,01    | 25,72    | 25,75    |
| SNORD38B (hsa)      | YP00203901 | 29,21        | 30,21    | 26,93    | 28,55    | 31,98    | 28,68    | 29,51    | 28,99    |
| hsa-miR-301b        | YP00204390 | 34,24        | 35,00    | 35,00    | 35,00    | 35,00    | 35,00    | 35,00    | 35,00    |
| SNORD49A (hsa)      | YP00203904 | 32,53        | 33,90    | 30,57    | 32,28    | 33,34    | 30,14    | 30,87    | 31,16    |
| hsa-miR-550a-5p     | YP00204638 | 34,63        | 35,00    | 35,00    | 35,00    | 35,00    | 35,00    | 35,00    | 35,00    |
| U6 snRNA (hsa, mmu) | YP00203907 | 35,00        | 35,00    | 33,10    | 31,92    | 35,00    | 32,63    | 30,40    | 32,12    |
| hsa-miR-532-5p      | YP00204221 | 31,65        | 33,73    | 34,40    | 35,00    | 33,69    | 31,91    | 33,75    | 33,60    |

|                 |            |       |       |       |       |       |       |       |       |
|-----------------|------------|-------|-------|-------|-------|-------|-------|-------|-------|
| hsa-miR-99a-5p  | YP00204521 | 27,85 | 28,92 | 29,09 | 28,46 | 28,77 | 27,01 | 29,76 | 29,54 |
| hsa-miR-16-5p   | YP00205702 | 24,88 | 27,60 | 25,76 | 26,67 | 26,26 | 25,30 | 27,18 | 26,30 |
| hsa-miR-98-5p   | YP00204640 | 30,88 | 33,14 | 31,80 | 35,00 | 32,97 | 31,81 | 33,88 | 33,32 |
| hsa-miR-185-5p  | YP00206037 | 29,03 | 31,81 | 30,10 | 29,92 | 28,35 | 29,33 | 31,57 | 30,47 |
| hsa-miR-25-3p   | YP00204361 | 27,70 | 30,32 | 28,82 | 29,10 | 29,42 | 27,82 | 30,18 | 29,58 |
| hsa-miR-765     | YP00204071 | 35,00 | 35,00 | 35,00 | 35,00 | 35,00 | 35,00 | 35,00 | 35,00 |
| hsa-miR-24-3p   | YP00204260 | 23,69 | 25,76 | 25,28 | 24,90 | 25,29 | 25,04 | 26,57 | 26,82 |
| hsa-miR-369-5p  | YP00206014 | 33,24 | 35,00 | 33,37 | 33,76 | 34,42 | 33,59 | 35,00 | 35,00 |
| hsa-miR-425-5p  | YP00204337 | 29,36 | 31,21 | 30,76 | 31,12 | 30,90 | 29,93 | 30,69 | 31,69 |
| hsa-miR-590-5p  | YP00204222 | 31,83 | 33,86 | 34,27 | 35,00 | 33,77 | 32,65 | 35,00 | 32,44 |
| hsa-miR-760     | YP00204549 | 35,00 | 35,00 | 35,00 | 35,00 | 35,00 | 35,00 | 35,00 | 35,00 |
| hsa-miR-574-3p  | YP00206011 | 27,57 | 30,35 | 29,47 | 35,00 | 31,25 | 28,83 | 31,38 | 30,69 |
| hsa-miR-130b-3p | YP00204317 | 30,81 | 32,98 | 30,79 | 31,71 | 32,12 | 30,92 | 32,94 | 31,46 |
| hsa-miR-30c-5p  | YP00204783 | 26,65 | 28,87 | 28,44 | 29,96 | 29,84 | 28,10 | 29,78 | 29,44 |
| hsa-miR-133b    | YP00206058 | 33,82 | 35,00 | 35,00 | 35,00 | 35,00 | 35,00 | 35,00 | 35,00 |
| hsa-miR-524-5p  | YP00204135 | 35,00 | 35,00 | 35,00 | 35,00 | 35,00 | 35,00 | 35,00 | 35,00 |
| hsa-miR-23a-3p  | YP00204772 | 22,48 | 25,17 | 24,85 | 24,82 | 24,87 | 23,98 | 23,94 | 25,27 |
| hsa-miR-193b-3p | YP00204226 | 26,47 | 28,13 | 27,87 | 28,05 | 26,76 | 25,40 | 27,23 | 27,25 |
| hsa-miR-501-5p  | YP00204648 | 33,72 | 33,65 | 34,43 | 34,02 | 34,25 | 31,81 | 33,89 | 33,51 |
| hsa-miR-518c-5p | YP00204280 | 35,00 | 35,00 | 35,00 | 35,00 | 35,00 | 35,00 | 35,00 | 35,00 |
| hsa-miR-130a-3p | YP00204658 | 26,97 | 31,15 | 28,72 | 30,46 | 29,23 | 28,74 | 30,87 | 29,02 |
| hsa-miR-933     | YP00205996 | 35,00 | 35,00 | 35,00 | 35,00 | 35,00 | 35,00 | 35,00 | 35,00 |
| hsa-miR-379-5p  | YP00205658 | 30,63 | 32,59 | 31,69 | 34,09 | 34,05 | 31,97 | 34,46 | 33,40 |
| hsa-miR-452-5p  | YP00204301 | 31,48 | 33,36 | 34,38 | 33,78 | 33,00 | 32,76 | 34,65 | 34,00 |
| hsa-miR-589-5p  | YP00205675 | 35,00 | 35,00 | 35,00 | 35,00 | 35,00 | 35,00 | 35,00 | 35,00 |
| hsa-miR-141-3p  | YP00204504 | 35,00 | 35,00 | 35,00 | 35,00 | 35,00 | 35,00 | 35,00 | 35,00 |
| hsa-miR-342-3p  | YP00205625 | 28,84 | 31,61 | 29,87 | 28,91 | 30,88 | 29,71 | 30,97 | 31,47 |
| hsa-miR-668-3p  | YP00204206 | 35,00 | 35,00 | 35,00 | 35,00 | 35,00 | 35,00 | 35,00 | 35,00 |
| hsa-miR-934     | YP02119292 | 35,00 | 35,00 | 35,00 | 35,00 | 35,00 | 35,00 | 35,00 | 35,00 |
| hsa-miR-101-3p  | YP00204786 | 29,68 | 33,75 | 31,96 | 32,16 | 32,10 | 31,37 | 33,41 | 32,32 |
| hsa-miR-539-5p  | YP00205656 | 33,77 | 35,00 | 32,35 | 35,00 | 35,00 | 34,01 | 35,00 | 35,00 |
| hsa-miR-331-3p  | YP00206046 | 29,56 | 31,35 | 30,40 | 34,51 | 32,50 | 30,66 | 32,78 | 32,31 |
| hsa-miR-499a-5p | YP00205935 | 35,00 | 35,00 | 35,00 | 35,00 | 35,00 | 35,00 | 35,00 | 35,00 |
| hsa-miR-196a-5p | YP00204386 | 35,00 | 35,00 | 35,00 | 35,00 | 32,33 | 31,01 | 33,23 | 32,37 |
| hsa-miR-888-5p  | YP00206024 | 35,00 | 35,00 | 35,00 | 35,00 | 35,00 | 35,00 | 35,00 | 35,00 |
| hsa-miR-330-3p  | YP00204017 | 32,05 | 35,00 | 33,97 | 35,00 | 35,00 | 35,00 | 35,00 | 35,00 |
| hsa-miR-570-3p  | YP00204694 | 35,00 | 32,97 | 35,00 | 35,00 | 32,11 | 35,00 | 35,00 | 35,00 |
| hsa-miR-518c-3p | YP00204554 | 35,00 | 35,00 | 35,00 | 35,00 | 35,00 | 35,00 | 35,00 | 35,00 |
| hsa-miR-200a-3p | YP00204707 | 35,00 | 35,00 | 35,00 | 35,00 | 35,00 | 35,00 | 35,00 | 35,00 |
| hsa-miR-188-5p  | YP00204239 | 33,84 | 35,00 | 35,00 | 35,00 | 33,63 | 32,90 | 35,00 | 34,31 |
| hsa-miR-26a-5p  | YP00206023 | 26,79 | 29,77 | 27,47 | 28,83 | 28,24 | 28,11 | 29,46 | 28,25 |
| hsa-miR-99b-5p  | YP00205983 | 27,39 | 29,20 | 28,70 | 30,37 | 29,83 | 28,62 | 30,59 | 30,59 |
| hsa-miR-431-5p  | YP00204737 | 30,76 | 32,75 | 32,71 | 33,48 | 32,45 | 31,61 | 33,60 | 33,73 |
| hsa-miR-23b-3p  | YP00204790 | 23,55 | 25,38 | 24,83 | 27,03 | 25,95 | 23,98 | 26,13 | 25,85 |
| hsa-miR-367-3p  | YP00204784 | 35,00 | 35,00 | 35,00 | 35,00 | 35,00 | 35,00 | 35,00 | 35,00 |
| hsa-miR-505-3p  | YP00204214 | 30,48 | 32,69 | 32,08 | 33,93 | 33,28 | 32,62 | 35,00 | 33,51 |



|                 |            |       |       |       |       |       |       |       |       |
|-----------------|------------|-------|-------|-------|-------|-------|-------|-------|-------|
| hsa-miR-432-5p  | YP00204776 | 30,30 | 31,87 | 31,53 | 30,77 | 32,22 | 33,03 | 33,38 | 35,00 |
| hsa-miR-154-3p  | YP00204096 | 32,70 | 35,00 | 35,00 | 35,00 | 35,00 | 32,61 | 35,00 | 35,00 |
| hsa-miR-27a-3p  | YP00206038 | 25,56 | 27,18 | 26,81 | 25,80 | 26,36 | 24,21 | 28,28 | 26,15 |
| hsa-miR-376c-3p | YP00204442 | 27,06 | 29,10 | 28,67 | 28,95 | 29,19 | 28,11 | 30,80 | 29,11 |
| hsa-miR-940     | YP00204094 | 29,41 | 31,42 | 30,66 | 29,53 | 28,44 | 27,60 | 28,55 | 29,44 |
| hsa-miR-22-5p   | YP00204255 | 30,95 | 33,30 | 32,69 | 35,00 | 33,32 | 29,84 | 32,03 | 31,18 |
| hsa-miR-224-5p  | YP00204641 | 31,60 | 32,03 | 33,49 | 35,00 | 33,05 | 30,57 | 31,31 | 31,77 |
| hsa-miR-885-5p  | YP00204473 | 35,00 | 35,00 | 35,00 | 35,00 | 35,00 | 35,00 | 35,00 | 35,00 |
| hsa-miR-320a    | YP00206042 | 25,79 | 28,17 | 26,99 | 26,98 | 27,02 | 25,99 | 27,70 | 27,65 |
| hsa-miR-18b-5p  | YP00204084 | 30,89 | 35,00 | 32,31 | 35,00 | 33,33 | 31,80 | 33,42 | 32,80 |
| hsa-miR-187-3p  | YP00204018 | 35,00 | 35,00 | 35,00 | 35,00 | 35,00 | 35,00 | 35,00 | 35,00 |
| hsa-miR-516b-5p | YP00204558 | 35,00 | 35,00 | 35,00 | 35,00 | 35,00 | 35,00 | 35,00 | 35,00 |
| hsa-miR-302c-5p | YP00205940 | 35,00 | 35,00 | 35,00 | 35,00 | 35,00 | 35,00 | 35,00 | 35,00 |
| hsa-miR-548b-3p | YP00204485 | 35,00 | 35,00 | 35,00 | 35,00 | 35,00 | 35,00 | 35,00 | 35,00 |
| hsa-miR-186-5p  | YP00206053 | 31,90 | 35,00 | 33,10 | 32,60 | 33,12 | 33,72 | 34,54 | 34,23 |
| hsa-miR-199a-5p | YP00204494 | 25,39 | 29,23 | 26,66 | 27,11 | 27,26 | 25,80 | 27,85 | 26,29 |
| hsa-miR-155-5p  | YP00204308 | 29,57 | 32,05 | 31,09 | 35,00 | 32,96 | 31,88 | 31,90 | 31,71 |
| hsa-miR-107     | YP00204468 | 27,37 | 29,92 | 28,56 | 29,91 | 30,39 | 29,26 | 30,54 | 30,27 |
| hsa-miR-302b-3p | YP00204773 | 35,00 | 35,00 | 35,00 | 35,00 | 35,00 | 35,00 | 35,00 | 35,00 |
| hsa-miR-662     | YP00204180 | 35,00 | 35,00 | 35,00 | 35,00 | 35,00 | 35,00 | 35,00 | 35,00 |
| hsa-miR-519d-3p | YP00204062 | 35,00 | 35,00 | 35,00 | 35,00 | 35,00 | 35,00 | 35,00 | 35,00 |
| hsa-miR-485-3p  | YP00206055 | 30,80 | 32,84 | 33,29 | 34,65 | 33,02 | 31,18 | 33,44 | 32,63 |
| hsa-miR-200b-3p | YP00206071 | 35,00 | 35,00 | 35,00 | 35,00 | 35,00 | 35,00 | 35,00 | 35,00 |
| hsa-miR-337-3p  | YP00205938 | 29,62 | 31,33 | 30,80 | 32,45 | 32,13 | 32,05 | 33,23 | 33,06 |
| hsa-miR-494-3p  | YP00204579 | 32,62 | 34,12 | 32,59 | 35,00 | 32,97 | 33,56 | 34,41 | 34,14 |
| hsa-miR-371a-3p | YP00204299 | 35,00 | 35,00 | 35,00 | 35,00 | 35,00 | 35,00 | 35,00 | 35,00 |
| hsa-miR-637     | YP00205679 | 35,00 | 35,00 | 35,00 | 35,00 | 35,00 | 35,00 | 35,00 | 35,00 |
| hsa-miR-144-3p  | YP00204754 | 35,00 | 35,00 | 35,00 | 35,00 | 35,00 | 35,00 | 35,00 | 35,00 |
| hsa-miR-16-1-3p | YP00206012 | 34,42 | 35,00 | 33,69 | 35,00 | 35,00 | 32,53 | 35,00 | 33,59 |
| hsa-miR-631     | YP00204312 | 35,00 | 35,00 | 35,00 | 35,00 | 35,00 | 35,00 | 35,00 | 35,00 |
| hsa-miR-34c-5p  | YP00205659 | 33,25 | 34,45 | 35,00 | 35,00 | 33,93 | 32,08 | 34,61 | 32,79 |
| hsa-miR-211-5p  | YP00204009 | 35,00 | 35,00 | 35,00 | 35,00 | 35,00 | 35,00 | 35,00 | 35,00 |
| hsa-miR-454-3p  | YP00205663 | 31,78 | 35,00 | 33,35 | 35,00 | 35,00 | 33,49 | 35,00 | 34,40 |
| hsa-let-7f-5p   | YP00204359 | 29,85 | 31,12 | 29,69 | 35,00 | 34,12 | 30,17 | 33,27 | 30,40 |
| hsa-miR-30e-5p  | YP00204714 | 29,35 | 31,60 | 29,89 | 35,00 | 33,11 | 30,20 | 33,04 | 30,90 |
| hsa-miR-34a-5p  | YP00204486 | 26,50 | 30,54 | 27,78 | 27,02 | 27,17 | 25,89 | 27,26 | 25,84 |
| hsa-miR-663a    | YP00204284 | 26,93 | 29,70 | 29,00 | 29,98 | 26,27 | 26,00 | 25,73 | 25,79 |
| hsa-miR-518e-3p | YP00204051 | 35,00 | 35,00 | 35,00 | 35,00 | 35,00 | 35,00 | 35,00 | 35,00 |
| hsa-miR-29b-3p  | YP00204679 | 28,37 | 33,16 | 30,79 | 35,00 | 31,13 | 28,89 | 31,11 | 28,43 |
| hsa-miR-658     | YP00204522 | 35,00 | 35,00 | 35,00 | 35,00 | 35,00 | 35,00 | 35,00 | 35,00 |
| hsa-miR-572     | YP00204696 | 34,47 | 33,17 | 35,00 | 35,00 | 33,30 | 33,68 | 32,33 | 33,34 |
| hsa-miR-802     | YP00205980 | 35,00 | 35,00 | 35,00 | 35,00 | 35,00 | 35,00 | 35,00 | 35,00 |
| hsa-miR-521     | YP00205890 | 35,00 | 35,00 | 35,00 | 35,00 | 35,00 | 35,00 | 35,00 | 35,00 |
| hsa-miR-433-3p  | YP00204036 | 30,12 | 32,24 | 32,47 | 30,88 | 30,05 | 27,94 | 31,74 | 30,15 |
| hsa-miR-660-5p  | YP00205911 | 30,93 | 33,38 | 32,51 | 33,69 | 33,12 | 31,53 | 34,63 | 32,41 |
| hsa-let-7c-5p   | YP00204767 | 27,48 | 28,34 | 26,81 | 29,93 | 28,19 | 27,31 | 29,60 | 28,49 |

|                  |            |       |       |       |       |       |       |       |       |
|------------------|------------|-------|-------|-------|-------|-------|-------|-------|-------|
| hsa-miR-28-5p    | YP00204322 | 29,21 | 32,45 | 30,72 | 31,63 | 32,11 | 30,85 | 32,80 | 31,58 |
| hsa-miR-324-5p   | YP00204057 | 29,53 | 31,95 | 31,16 | 32,03 | 32,81 | 30,94 | 33,41 | 32,98 |
| hsa-miR-219a-5p  | YP00204780 | 33,27 | 35,00 | 34,50 | 35,00 | 35,00 | 35,00 | 35,00 | 35,00 |
| hsa-miR-19b-3p   | YP00204450 | 25,87 | 28,86 | 27,80 | 28,49 | 28,19 | 25,54 | 29,13 | 27,22 |
| hsa-miR-526b-5p  | YP00204259 | 35,00 | 35,00 | 35,00 | 35,00 | 35,00 | 35,00 | 35,00 | 35,00 |
| hsa-miR-215-5p   | YP00204598 | 35,00 | 35,00 | 35,00 | 35,00 | 35,00 | 35,00 | 35,00 | 34,65 |
| hsa-miR-30b-5p   | YP00204765 | 26,82 | 30,56 | 28,92 | 31,75 | 29,80 | 27,55 | 30,03 | 28,69 |
| hsa-miR-184      | YP00204601 | 35,00 | 35,00 | 35,00 | 35,00 | 35,00 | 35,00 | 35,00 | 35,00 |
| hsa-miR-422a     | YP00204164 | 35,00 | 35,00 | 35,00 | 35,00 | 35,00 | 35,00 | 35,00 | 35,00 |
| hsa-miR-199a-3p  | YP00204536 | 23,92 | 27,51 | 25,70 | 28,44 | 25,80 | 24,02 | 26,82 | 25,44 |
| hsa-miR-335-5p   | YP02119293 | 30,82 | 29,54 | 32,44 | 34,44 | 32,87 | 32,34 | 35,00 | 35,00 |
| hsa-miR-519a-3p  | YP00205919 | 35,00 | 35,00 | 35,00 | 35,00 | 35,00 | 35,00 | 35,00 | 35,00 |
| hsa-miR-21-5p    | YP00204230 | 22,20 | 24,61 | 23,78 | 23,68 | 24,13 | 22,23 | 25,29 | 23,04 |
| hsa-miR-129-2-3p | YP00206067 | 34,41 | 35,00 | 35,00 | 35,00 | 35,00 | 34,09 | 35,00 | 35,00 |
| hsa-miR-26b-5p   | YP00204172 | 28,82 | 32,64 | 30,55 | 31,59 | 31,26 | 31,51 | 32,96 | 30,99 |
| hsa-miR-214-3p   | YP00204510 | 25,87 | 28,29 | 26,40 | 26,06 | 26,63 | 25,85 | 26,85 | 26,33 |
| hsa-miR-32-5p    | YP00204792 | 31,39 | 34,31 | 33,49 | 35,00 | 35,00 | 32,81 | 34,06 | 31,99 |
| hsa-miR-324-3p   | YP00204303 | 29,75 | 32,91 | 31,46 | 31,98 | 31,47 | 30,95 | 30,99 | 32,12 |
| hsa-miR-488-3p   | YP00204469 | 35,00 | 35,00 | 35,00 | 35,00 | 35,00 | 35,00 | 35,00 | 35,00 |
| hsa-miR-371a-5p  | YP00204493 | 35,00 | 35,00 | 35,00 | 35,00 | 35,00 | 35,00 | 35,00 | 35,00 |
| hsa-miR-455-5p   | YP00204363 | 32,20 | 33,10 | 34,48 | 32,06 | 35,00 | 30,93 | 33,65 | 31,35 |
| hsa-miR-891a-5p  | YP00204220 | 35,00 | 35,00 | 35,00 | 35,00 | 35,00 | 35,00 | 35,00 | 35,00 |
| hsa-miR-549a     | YP00205975 | 35,00 | 35,00 | 35,00 | 35,00 | 35,00 | 35,00 | 35,00 | 33,99 |
| hsa-miR-205-5p   | YP00204487 | 35,00 | 35,00 | 35,00 | 35,00 | 35,00 | 35,00 | 35,00 | 35,00 |
| hsa-miR-518b     | YP00204405 | 35,00 | 35,00 | 35,00 | 35,00 | 35,00 | 35,00 | 35,00 | 35,00 |
| hsa-miR-19a-3p   | YP00205862 | 25,82 | 28,99 | 27,70 | 27,66 | 28,02 | 26,95 | 29,32 | 26,68 |
| hsa-miR-150-5p   | YP00204660 | 35,00 | 35,00 | 35,00 | 35,00 | 35,00 | 35,00 | 35,00 | 34,44 |
| hsa-miR-15a-5p   | YP00204066 | 26,80 | 30,36 | 27,78 | 35,00 | 29,04 | 28,06 | 30,58 | 27,81 |
| hsa-let-7d-3p    | YP00205627 | 30,99 | 33,07 | 31,40 | 34,46 | 32,23 | 29,99 | 32,69 | 32,27 |
| hsa-miR-608      | YP00204286 | 35,00 | 35,00 | 35,00 | 35,00 | 35,00 | 35,00 | 35,00 | 35,00 |
| hsa-miR-671-5p   | YP00205649 | 31,80 | 33,68 | 32,78 | 35,00 | 35,00 | 32,12 | 34,66 | 33,42 |
| hsa-miR-497-5p   | YP00204354 | 32,73 | 35,00 | 33,93 | 35,00 | 32,19 | 31,66 | 33,83 | 32,28 |
| hsa-miR-877-5p   | YP00205626 | 34,37 | 35,00 | 32,95 | 35,00 | 33,73 | 33,57 | 35,00 | 35,00 |
| hsa-miR-187-5p   | YP00205920 | 35,00 | 35,00 | 35,00 | 35,00 | 35,00 | 35,00 | 35,00 | 35,00 |
| hsa-miR-10b-5p   | YP00205637 | 28,75 | 35,00 | 29,51 | 35,00 | 29,34 | 27,51 | 29,81 | 29,38 |
| hsa-let-7i-5p    | YP00204394 | 23,72 | 27,47 | 25,75 | 25,48 | 25,88 | 23,41 | 27,82 | 26,26 |
| hsa-miR-202-5p   | YP00205616 | 35,00 | 35,00 | 35,00 | 35,00 | 35,00 | 35,00 | 35,00 | 35,00 |
| hsa-miR-652-3p   | YP00204387 | 31,05 | 33,27 | 31,90 | 33,55 | 32,43 | 35,00 | 33,11 | 33,37 |
| hsa-miR-126-5p   | YP00206010 | 35,00 | 35,00 | 35,00 | 35,00 | 35,00 | 35,00 | 35,00 | 35,00 |
| hsa-miR-30e-3p   | YP00204410 | 30,66 | 31,76 | 32,73 | 35,00 | 35,00 | 31,73 | 32,40 | 32,48 |
| hsa-miR-181c-5p  | YP00204683 | 32,75 | 35,00 | 35,00 | 35,00 | 35,00 | 34,00 | 35,00 | 35,00 |
| hsa-miR-9-3p     | YP00204620 | 35,00 | 35,00 | 35,00 | 35,00 | 35,00 | 35,00 | 35,00 | 35,00 |
| hsa-miR-548c-3p  | YP00204697 | 35,00 | 35,00 | 35,00 | 35,00 | 35,00 | 35,00 | 35,00 | 35,00 |
| hsa-miR-152-3p   | YP00204294 | 26,62 | 30,07 | 29,06 | 29,07 | 29,21 | 28,99 | 30,73 | 29,52 |
| hsa-miR-93-5p    | YP00204715 | 28,08 | 31,11 | 29,12 | 29,72 | 30,74 | 28,46 | 30,73 | 29,60 |
| hsa-miR-365a-3p  | YP00204622 | 27,13 | 28,92 | 27,37 | 30,42 | 28,25 | 28,41 | 29,44 | 29,08 |

|                 |            |       |       |       |       |       |       |       |       |
|-----------------|------------|-------|-------|-------|-------|-------|-------|-------|-------|
| hsa-miR-29c-3p  | YP00204729 | 25,37 | 29,77 | 27,05 | 28,75 | 26,65 | 26,68 | 28,20 | 26,20 |
| hsa-miR-372-3p  | YP00204137 | 35,00 | 35,00 | 35,00 | 35,00 | 35,00 | 35,00 | 35,00 | 35,00 |
| hsa-miR-133a-3p | YP00204788 | 32,74 | 35,00 | 35,00 | 35,00 | 35,00 | 35,00 | 35,00 | 35,00 |
| hsa-miR-124-3p  | YP00206026 | 34,49 | 35,00 | 35,00 | 35,00 | 35,00 | 35,00 | 35,00 | 35,00 |
| hsa-miR-190a-5p | YP00204763 | 33,80 | 35,00 | 34,24 | 35,00 | 34,45 | 33,22 | 35,00 | 34,47 |
| hsa-miR-302a-3p | YP00206059 | 35,00 | 35,00 | 35,00 | 35,00 | 35,00 | 34,22 | 35,00 | 35,00 |
| hsa-miR-595     | YP00204070 | 35,00 | 35,00 | 35,00 | 35,00 | 35,00 | 35,00 | 35,00 | 35,00 |
| hsa-miR-602     | YP00204316 | 35,00 | 35,00 | 35,00 | 35,00 | 35,00 | 35,00 | 35,00 | 35,00 |
| hsa-miR-223-3p  | YP00205986 | 35,00 | 35,00 | 35,00 | 35,00 | 35,00 | 35,00 | 35,00 | 35,00 |
| hsa-miR-627-5p  | YP00205979 | 35,00 | 35,00 | 35,00 | 35,00 | 35,00 | 35,00 | 35,00 | 35,00 |
| hsa-miR-34b-3p  | YP00204005 | 35,00 | 35,00 | 35,00 | 35,00 | 35,00 | 33,93 | 35,00 | 35,00 |
| hsa-miR-410-3p  | YP00204042 | 30,67 | 32,75 | 31,95 | 33,02 | 33,34 | 31,46 | 35,00 | 34,31 |
| hsa-miR-17-5p   | YP02119304 | 28,31 | 30,69 | 29,80 | 30,95 | 30,13 | 28,76 | 30,95 | 29,32 |
| hsa-miR-376a-3p | YP00204508 | 26,84 | 28,65 | 28,64 | 28,78 | 29,29 | 28,48 | 30,84 | 29,42 |
| hsa-miR-514a-3p | YP00205931 | 35,00 | 35,00 | 35,00 | 35,00 | 35,00 | 35,00 | 35,00 | 35,00 |
| hsa-miR-512-5p  | YP00204134 | 35,00 | 35,00 | 35,00 | 35,00 | 35,00 | 35,00 | 35,00 | 35,00 |
| hsa-miR-449a    | YP00204481 | 35,00 | 35,00 | 35,00 | 35,00 | 35,00 | 35,00 | 35,00 | 35,00 |
| hsa-miR-498     | YP00204150 | 35,00 | 35,00 | 35,00 | 35,00 | 35,00 | 35,00 | 35,00 | 35,00 |
| hsa-miR-148b-3p | YP00204047 | 28,54 | 32,73 | 30,46 | 33,66 | 31,33 | 30,04 | 33,86 | 31,35 |
| hsa-miR-127-3p  | YP00204048 | 26,94 | 29,08 | 28,56 | 29,50 | 29,69 | 29,05 | 29,73 | 29,27 |
| hsa-miR-598-3p  | YP00204320 | 32,58 | 35,00 | 35,00 | 35,00 | 35,00 | 35,00 | 35,00 | 35,00 |
| hsa-miR-96-5p   | YP00204417 | 35,00 | 35,00 | 35,00 | 35,00 | 35,00 | 35,00 | 35,00 | 35,00 |
| hsa-let-7d-5p   | YP00204124 | 28,56 | 30,23 | 29,26 | 31,42 | 30,39 | 28,97 | 31,80 | 30,15 |
| hsa-miR-135b-5p | YP00204130 | 35,00 | 35,00 | 35,00 | 35,00 | 35,00 | 35,00 | 35,00 | 35,00 |
| hsa-miR-495-3p  | YP00206015 | 29,60 | 31,38 | 30,52 | 33,09 | 31,08 | 31,47 | 32,94 | 31,31 |
| hsa-miR-299-5p  | YP00204544 | 30,17 | 31,64 | 31,77 | 33,72 | 32,38 | 31,95 | 33,66 | 31,78 |
| hsa-miR-34c-3p  | YP00204373 | 35,00 | 35,00 | 33,91 | 32,17 | 33,94 | 31,75 | 35,00 | 31,87 |
| hsa-miR-596     | YP00204002 | 35,00 | 35,00 | 35,00 | 35,00 | 35,00 | 34,25 | 35,00 | 35,00 |
| hsa-miR-744-5p  | YP00204663 | 29,88 | 32,10 | 31,37 | 35,00 | 32,81 | 31,97 | 32,71 | 32,55 |
| hsa-miR-145-5p  | YP00204483 | 24,03 | 26,35 | 25,95 | 27,73 | 26,87 | 24,63 | 27,31 | 26,60 |
| hsa-miR-622     | YP00205615 | 35,00 | 33,06 | 35,00 | 35,00 | 35,00 | 35,00 | 35,00 | 35,00 |
| hsa-miR-516a-5p | YP00204471 | 35,00 | 35,00 | 35,00 | 35,00 | 35,00 | 35,00 | 35,00 | 35,00 |
| hsa-let-7a-5p   | YP00205727 | 26,17 | 27,10 | 25,70 | 28,73 | 27,84 | 25,56 | 28,29 | 27,28 |
| hsa-miR-96-3p   | YP00205899 | 35,00 | 35,00 | 35,00 | 35,00 | 35,00 | 35,00 | 35,00 | 35,00 |
| hsa-miR-185-3p  | YP00205710 | 35,00 | 34,23 | 35,00 | 34,58 | 35,00 | 35,00 | 35,00 | 35,00 |
| hsa-miR-615-3p  | YP00204453 | 33,44 | 34,31 | 34,57 | 32,81 | 30,90 | 30,61 | 31,86 | 31,43 |
| hsa-miR-128-3p  | YP00205995 | 31,21 | 34,44 | 35,00 | 35,00 | 33,16 | 32,01 | 35,00 | 33,98 |
| hsa-miR-766-3p  | YP00204499 | 33,57 | 35,00 | 34,02 | 35,00 | 35,00 | 32,14 | 35,00 | 35,00 |
| hsa-miR-206     | YP00206073 | 35,00 | 35,00 | 35,00 | 35,00 | 35,00 | 35,00 | 35,00 | 35,00 |
| hsa-miR-298     | YP00204115 | 35,00 | 35,00 | 35,00 | 35,00 | 35,00 | 35,00 | 35,00 | 35,00 |
| hsa-miR-193a-5p | YP00204665 | 27,77 | 29,08 | 28,44 | 30,67 | 28,84 | 27,44 | 29,36 | 29,57 |
| hsa-miR-449b-5p | YP00204751 | 35,00 | 35,00 | 35,00 | 35,00 | 35,00 | 35,00 | 35,00 | 35,00 |
| hsa-miR-520d-5p | YP00204684 | 35,00 | 35,00 | 35,00 | 35,00 | 35,00 | 35,00 | 35,00 | 35,00 |
| hsa-miR-192-5p  | YP00204099 | 32,79 | 35,00 | 33,73 | 34,01 | 35,00 | 35,00 | 35,00 | 35,00 |
| hsa-miR-29a-3p  | YP00204698 | 24,51 | 28,90 | 26,70 | 27,78 | 26,11 | 25,47 | 27,10 | 25,69 |
| hsa-miR-18a-3p  | YP00204523 | 32,21 | 35,00 | 33,83 | 35,00 | 35,00 | 33,78 | 35,00 | 34,37 |



|                  |            |       |       |       |       |       |       |       |       |
|------------------|------------|-------|-------|-------|-------|-------|-------|-------|-------|
| hsa-miR-299-3p   | YP00204702 | 33,53 | 35,00 | 35,00 | 35,00 | 35,00 | 34,06 | 34,37 | 35,00 |
| hsa-miR-142-3p   | YP00204291 | 35,00 | 35,00 | 35,00 | 35,00 | 35,00 | 34,55 | 35,00 | 34,16 |
| hsa-miR-338-3p   | YP00204719 | 35,00 | 35,00 | 35,00 | 35,00 | 35,00 | 35,00 | 35,00 | 35,00 |
| hsa-miR-584-5p   | YP00204568 | 35,00 | 35,00 | 26,72 | 35,00 | 35,00 | 35,00 | 35,00 | 35,00 |
| hsa-miR-377-3p   | YP00204733 | 30,81 | 33,16 | 31,51 | 33,88 | 31,39 | 30,94 | 32,30 | 30,97 |
| hsa-miR-216a-5p  | YP00204167 | 35,00 | 35,00 | 35,00 | 35,00 | 35,00 | 34,48 | 35,00 | 35,00 |
| hsa-miR-424-5p   | YP00204736 | 29,18 | 30,80 | 29,74 | 32,18 | 27,91 | 24,88 | 27,25 | 24,71 |
| hsa-miR-921      | YP00204281 | 35,00 | 35,00 | 35,00 | 35,00 | 35,00 | 35,00 | 35,00 | 35,00 |
| hsa-miR-513a-5p  | YP00205900 | 35,00 | 35,00 | 35,00 | 35,00 | 35,00 | 35,00 | 35,00 | 35,00 |
| hsa-miR-140-3p   | YP00204304 | 29,21 | 29,85 | 29,93 | 30,89 | 30,22 | 30,08 | 32,49 | 31,18 |
| hsa-miR-181a-5p  | YP00206081 | 26,40 | 27,78 | 27,48 | 29,66 | 29,43 | 26,99 | 28,35 | 26,99 |
| hsa-miR-10a-5p   | YP00204778 | 35,00 | 35,00 | 35,00 | 35,00 | 33,18 | 28,78 | 31,12 | 30,39 |
| hsa-miR-106a-5p  | YP00204563 | 27,83 | 31,29 | 29,86 | 29,66 | 30,47 | 28,78 | 31,49 | 28,76 |
| hsa-miR-182-5p   | YP00206070 | 35,00 | 35,00 | 35,00 | 35,00 | 35,00 | 35,00 | 35,00 | 35,00 |
| hsa-miR-370-3p   | YP00204011 | 33,54 | 35,00 | 33,99 | 33,02 | 33,44 | 35,00 | 35,00 | 31,43 |
| hsa-miR-576-5p   | YP00206064 | 35,00 | 35,00 | 35,00 | 32,97 | 35,00 | 35,00 | 35,00 | 35,00 |
| hsa-miR-425-3p   | YP00204038 | 31,61 | 35,00 | 33,31 | 33,62 | 34,07 | 31,67 | 34,26 | 34,20 |
| hsa-miR-450a-5p  | YP00206085 | 33,07 | 34,05 | 33,82 | 34,05 | 32,13 | 30,54 | 33,23 | 32,10 |
| hsa-miR-411-5p   | YP00204531 | 28,85 | 31,52 | 31,72 | 32,62 | 33,77 | 31,96 | 34,66 | 33,74 |
| hsa-miR-216b-5p  | YP00204289 | 35,00 | 35,00 | 35,00 | 35,00 | 35,00 | 35,00 | 35,00 | 35,00 |
| hsa-miR-106b-5p  | YP00205884 | 27,92 | 30,64 | 29,05 | 29,61 | 30,89 | 28,77 | 31,77 | 28,85 |
| hsa-miR-22-3p    | YP00204606 | 24,88 | 27,79 | 26,49 | 28,82 | 26,26 | 25,07 | 27,44 | 26,37 |
| hsa-miR-510-5p   | YP00204349 | 35,00 | 35,00 | 35,00 | 35,00 | 35,00 | 35,00 | 35,00 | 35,00 |
| hsa-miR-212-3p   | YP00204170 | 31,76 | 35,00 | 34,63 | 35,00 | 35,00 | 34,43 | 35,00 | 35,00 |
| hsa-miR-525-5p   | YP00204355 | 35,00 | 35,00 | 35,00 | 35,00 | 35,00 | 35,00 | 35,00 | 35,00 |
| hsa-miR-542-5p   | YP00204198 | 33,44 | 35,00 | 34,50 | 35,00 | 33,39 | 30,71 | 33,11 | 32,82 |
| hsa-miR-576-3p   | YP00204195 | 35,00 | 35,00 | 35,00 | 35,00 | 35,00 | 35,00 | 35,00 | 35,00 |
| hsa-miR-583      | YP00204021 | 35,00 | 35,00 | 35,00 | 35,00 | 35,00 | 35,00 | 35,00 | 35,00 |
| hsa-miR-483-3p   | YP00204012 | 35,00 | 34,65 | 35,00 | 33,06 | 35,00 | 32,99 | 33,75 | 35,00 |
| hsa-miR-582-5p   | YP00204254 | 35,00 | 35,00 | 35,00 | 33,95 | 35,00 | 35,00 | 35,00 | 35,00 |
| hsa-miR-183-5p   | YP00206030 | 35,00 | 35,00 | 35,00 | 35,00 | 35,00 | 35,00 | 35,00 | 35,00 |
| hsa-miR-33b-5p   | YP00205860 | 35,00 | 35,00 | 35,00 | 35,00 | 35,00 | 33,91 | 35,00 | 35,00 |
| hsa-miR-193a-3p  | YP00204591 | 33,17 | 35,00 | 33,40 | 35,00 | 34,31 | 35,00 | 35,00 | 33,37 |
| hsa-miR-153-3p   | YP00204338 | 35,00 | 35,00 | 35,00 | 35,00 | 35,00 | 35,00 | 35,00 | 35,00 |
| hsa-let-7e-5p    | YP00205711 | 29,16 | 29,66 | 28,90 | 28,07 | 29,87 | 28,10 | 30,52 | 30,06 |
| hsa-miR-409-3p   | YP00204358 | 29,64 | 31,65 | 31,66 | 31,60 | 31,67 | 30,75 | 32,64 | 32,03 |
| hsa-miR-100-5p   | YP00205689 | 25,07 | 25,83 | 25,36 | 26,09 | 26,72 | 24,97 | 27,04 | 27,28 |
| hsa-miR-629-5p   | YP00204370 | 33,81 | 35,00 | 35,00 | 35,00 | 35,00 | 35,00 | 35,00 | 35,00 |
| hsa-miR-484      | YP00205636 | 28,40 | 31,01 | 29,57 | 31,66 | 30,03 | 28,27 | 30,23 | 30,60 |
| hsa-miR-429      | YP00205901 | 35,00 | 35,00 | 35,00 | 35,00 | 35,00 | 35,00 | 35,00 | 35,00 |
| hsa-miR-30c-2-3p | YP00205632 | 35,00 | 35,00 | 35,00 | 35,00 | 35,00 | 35,00 | 35,00 | 35,00 |
| hsa-miR-518a-3p  | YP00206069 | 35,00 | 35,00 | 35,00 | 35,00 | 35,00 | 35,00 | 35,00 | 35,00 |
| hsa-miR-340-5p   | YP00206068 | 33,58 | 34,40 | 34,53 | 35,00 | 35,00 | 35,00 | 35,00 | 35,00 |
| hsa-miR-508-3p   | YP00204480 | 35,00 | 35,00 | 35,00 | 35,00 | 35,00 | 35,00 | 35,00 | 35,00 |
| hsa-miR-381-3p   | YP00205887 | 31,12 | 33,38 | 31,84 | 32,10 | 33,19 | 31,44 | 33,09 | 32,31 |
| hsa-miR-148a-3p  | YP00205867 | 35,00 | 35,00 | 35,00 | 35,00 | 30,32 | 28,81 | 31,14 | 29,56 |











|                   |            |       |       |       |       |       |       |       |       |
|-------------------|------------|-------|-------|-------|-------|-------|-------|-------|-------|
| hsa-miR-548l      | YP00205891 | 35,00 | 35,00 | 35,00 | 35,00 | 35,00 | 35,00 | 35,00 | 35,00 |
| hsa-miR-586       | YP00204205 | 35,00 | 35,00 | 35,00 | 35,00 | 35,00 | 35,00 | 35,00 | 35,00 |
| hsa-miR-103b      | YP00204740 | 35,00 | 35,00 | 35,00 | 35,00 | 35,00 | 35,00 | 35,00 | 35,00 |
| hsa-miR-488-5p    | YP00205981 | 35,00 | 35,00 | 35,00 | 35,00 | 35,00 | 35,00 | 35,00 | 35,00 |
| hsa-miR-129-1-3p  | YP00206074 | 35,00 | 35,00 | 35,00 | 35,00 | 35,00 | 35,00 | 35,00 | 35,00 |
| hsa-miR-192-3p    | YP00204272 | 35,00 | 35,00 | 35,00 | 35,00 | 35,00 | 35,00 | 35,00 | 35,00 |
| hsa-miR-632       | YP00205600 | 35,00 | 35,00 | 35,00 | 35,00 | 35,00 | 35,00 | 35,00 | 34,88 |
| hsa-miR-181a-2-3p | YP00204142 | 35,00 | 34,34 | 35,00 | 35,00 | 35,00 | 34,01 | 35,00 | 35,00 |
| hsa-miR-1909-3p   | YP00205697 | 35,00 | 35,00 | 35,00 | 35,00 | 35,00 | 35,00 | 35,00 | 35,00 |
| hsa-miR-573       | YP00204216 | 35,00 | 35,00 | 35,00 | 35,00 | 35,00 | 35,00 | 35,00 | 35,00 |
| hsa-miR-302d-5p   | YP00204033 | 35,00 | 35,00 | 35,00 | 35,00 | 35,00 | 35,00 | 35,00 | 35,00 |
| hsa-miR-194-3p    | YP00204204 | 35,00 | 35,00 | 34,85 | 35,00 | 34,25 | 33,71 | 34,72 | 33,07 |
| hsa-miR-302b-5p   | YP00205676 | 35,00 | 35,00 | 35,00 | 35,00 | 35,00 | 35,00 | 35,00 | 35,00 |
| hsa-miR-551b-5p   | YP00204630 | 35,00 | 35,00 | 35,00 | 35,00 | 35,00 | 35,00 | 35,00 | 35,00 |
| hsa-miR-635       | YP00205936 | 35,00 | 35,00 | 35,00 | 35,00 | 35,00 | 35,00 | 35,00 | 35,00 |
| hsa-miR-518d-3p   | YP00204628 | 35,00 | 35,00 | 35,00 | 35,00 | 35,00 | 35,00 | 35,00 | 35,00 |
| hsa-miR-569       | YP00205666 | 35,00 | 35,00 | 35,00 | 35,00 | 35,00 | 35,00 | 35,00 | 35,00 |
| hsa-miR-125b-1-3p | YP00204400 | 30,93 | 33,36 | 31,69 | 33,96 | 31,00 | 30,72 | 32,33 | 31,07 |
| hsa-miR-218-2-3p  | YP00205639 | 35,00 | 35,00 | 35,00 | 35,00 | 35,00 | 35,00 | 35,00 | 35,00 |
| hsa-miR-519c-3p   | YP00204016 | 35,00 | 35,00 | 35,00 | 35,00 | 35,00 | 35,00 | 35,00 | 35,00 |
| hsa-miR-554       | YP00204556 | 35,00 | 35,00 | 35,00 | 35,00 | 35,00 | 35,00 | 35,00 | 35,00 |
| hsa-miR-938       | YP00205912 | 34,85 | 35,00 | 34,90 | 35,00 | 35,00 | 35,00 | 35,00 | 35,00 |
| hsa-miR-1243      | YP00204211 | 35,00 | 35,00 | 35,00 | 35,00 | 35,00 | 35,00 | 35,00 | 35,00 |
| hsa-miR-708-3p    | YP00204681 | 33,39 | 34,78 | 35,00 | 35,00 | 35,00 | 33,77 | 34,89 | 35,00 |
| hsa-miR-1185-5p   | YP00205926 | 32,07 | 35,00 | 32,92 | 34,29 | 35,00 | 33,97 | 35,00 | 34,63 |
| hsa-miR-512-3p    | YP00204382 | 35,00 | 35,00 | 35,00 | 35,00 | 35,00 | 35,00 | 35,00 | 35,00 |
| hsa-miR-587       | YP00205876 | 35,00 | 35,00 | 35,00 | 35,00 | 35,00 | 35,00 | 35,00 | 35,00 |
| hsa-miR-603       | YP00204112 | 35,00 | 35,00 | 35,00 | 35,00 | 35,00 | 35,00 | 35,00 | 35,00 |
| hsa-miR-1184      | YP00204330 | 35,00 | 35,00 | 35,00 | 35,00 | 35,00 | 35,00 | 35,00 | 35,00 |
| hsa-miR-20a-3p    | YP00204052 | 35,00 | 35,00 | 35,00 | 35,00 | 35,00 | 35,00 | 35,00 | 35,00 |
| hsa-miR-588       | YP00205885 | 35,00 | 35,00 | 35,00 | 35,00 | 35,00 | 35,00 | 35,00 | 35,00 |
| hsa-miR-455-3p    | YP00204035 | 30,56 | 31,35 | 30,62 | 30,41 | 32,01 | 29,45 | 30,96 | 30,83 |
| hsa-miR-582-3p    | YP00204072 | 35,00 | 35,00 | 35,00 | 35,00 | 35,00 | 35,00 | 35,00 | 35,00 |
| hsa-miR-409-5p    | YP00204014 | 31,37 | 34,19 | 32,89 | 35,00 | 33,79 | 32,80 | 35,00 | 35,00 |
| hsa-miR-452-3p    | YP00204201 | 35,00 | 35,00 | 35,00 | 35,00 | 35,00 | 35,00 | 35,00 | 35,00 |
| hsa-miR-19b-1-5p  | YP00204310 | 34,74 | 35,00 | 34,33 | 35,00 | 35,00 | 34,23 | 35,00 | 35,00 |
| hsa-miR-610       | YP00204492 | 35,00 | 35,00 | 35,00 | 35,00 | 35,00 | 35,00 | 35,00 | 35,00 |
| hsa-miR-511-5p    | YP00204046 | 35,00 | 35,00 | 35,00 | 35,00 | 35,00 | 35,00 | 35,00 | 35,00 |
| hsa-miR-200c-5p   | YP02119294 | 35,00 | 35,00 | 35,00 | 35,00 | 35,00 | 35,00 | 35,00 | 35,00 |
| hsa-let-7a-3p     | YP00206084 | 35,00 | 35,00 | 35,00 | 35,00 | 35,00 | 35,00 | 35,00 | 35,00 |
| hsa-miR-135a-3p   | YP00204022 | 35,00 | 35,00 | 35,00 | 35,00 | 35,00 | 35,00 | 35,00 | 35,00 |
| hsa-miR-520a-5p   | YP00204340 | 35,00 | 35,00 | 35,00 | 35,00 | 35,00 | 35,00 | 35,00 | 35,00 |
| hsa-miR-1468-5p   | YP00204577 | 35,00 | 35,00 | 35,00 | 35,00 | 35,00 | 35,00 | 35,00 | 35,00 |
| hsa-miR-628-5p    | YP00205893 | 35,00 | 35,00 | 35,00 | 35,00 | 35,00 | 35,00 | 35,00 | 35,00 |
| hsa-miR-552-3p    | YP00206032 | 35,00 | 35,00 | 35,00 | 35,00 | 35,00 | 35,00 | 35,00 | 35,00 |
| hsa-miR-145-3p    | YP00204192 | 31,02 | 33,50 | 32,36 | 35,00 | 34,76 | 32,40 | 35,00 | 32,98 |

|                   |            |       |       |       |       |       |       |       |       |
|-------------------|------------|-------|-------|-------|-------|-------|-------|-------|-------|
| hsa-miR-378a-5p   | YP00204347 | 35,00 | 35,00 | 35,00 | 35,00 | 35,00 | 35,00 | 34,60 | 35,00 |
| hsa-miR-7-1-3p    | YP00205888 | 32,94 | 35,00 | 33,31 | 35,00 | 35,00 | 33,84 | 35,00 | 35,00 |
| hsa-miR-181c-3p   | YP00204213 | 33,97 | 35,00 | 34,71 | 35,00 | 35,00 | 35,00 | 35,00 | 35,00 |
| hsa-miR-195-3p    | YP00204128 | 35,00 | 35,00 | 35,00 | 35,00 | 35,00 | 34,82 | 35,00 | 35,00 |
| hsa-miR-578       | YP00204269 | 35,00 | 35,00 | 35,00 | 35,00 | 35,00 | 35,00 | 35,00 | 35,00 |
| hsa-miR-505-5p    | YP00205657 | 35,00 | 35,00 | 35,00 | 35,00 | 35,00 | 35,00 | 35,00 | 35,00 |
| hsa-miR-875-3p    | YP00204231 | 35,00 | 35,00 | 35,00 | 35,00 | 35,00 | 35,00 | 35,00 | 35,00 |
| hsa-miR-450b-5p   | YP00205607 | 34,82 | 35,00 | 34,65 | 35,00 | 35,00 | 34,78 | 35,00 | 35,00 |
| hsa-miR-876-5p    | YP00204527 | 35,00 | 35,00 | 35,00 | 35,00 | 35,00 | 35,00 | 35,00 | 35,00 |
| hsa-miR-362-3p    | YP00205612 | 34,02 | 35,00 | 35,00 | 34,62 | 34,64 | 33,20 | 34,26 | 33,11 |
| hsa-miR-624-5p    | YP00204625 | 35,00 | 35,00 | 35,00 | 35,00 | 35,00 | 33,26 | 35,00 | 35,00 |
| hsa-miR-27a-5p    | YP00206021 | 34,42 | 31,44 | 33,17 | 35,00 | 33,21 | 32,18 | 33,41 | 28,16 |
| hsa-miR-744-3p    | YP00206082 | 34,43 | 35,00 | 35,00 | 35,00 | 35,00 | 35,00 | 35,00 | 35,00 |
| hsa-miR-139-3p    | YP00205661 | 32,05 | 33,33 | 32,28 | 34,43 | 31,87 | 31,29 | 34,12 | 32,11 |
| hsa-miR-138-2-3p  | YP00204477 | 35,00 | 35,00 | 35,00 | 35,00 | 35,00 | 35,00 | 35,00 | 35,00 |
| hsa-miR-655-3p    | YP00205645 | 34,56 | 35,00 | 31,75 | 35,00 | 35,00 | 33,84 | 35,00 | 32,81 |
| hsa-miR-99b-3p    | YP00204064 | 33,03 | 34,06 | 33,67 | 34,64 | 33,98 | 33,87 | 34,09 | 35,00 |
| hsa-miR-581       | YP00205696 | 35,00 | 35,00 | 35,00 | 35,00 | 35,00 | 35,00 | 35,00 | 35,00 |
| hsa-miR-191-3p    | YP00204196 | 35,00 | 35,00 | 35,00 | 35,00 | 35,00 | 35,00 | 35,00 | 35,00 |
| hsa-miR-32-3p     | YP00205648 | 35,00 | 35,00 | 35,00 | 35,00 | 35,00 | 35,00 | 35,00 | 35,00 |
| hsa-miR-1204      | YP00204123 | 35,00 | 35,00 | 35,00 | 35,00 | 35,00 | 35,00 | 35,00 | 35,00 |
| hsa-miR-548j-5p   | YP00205861 | 35,00 | 35,00 | 35,00 | 35,00 | 35,00 | 35,00 | 35,00 | 35,00 |
| hsa-miR-555       | YP00204377 | 35,00 | 35,00 | 35,00 | 35,00 | 35,00 | 35,00 | 35,00 | 35,00 |
| hsa-miR-1224-3p   | YP00204045 | 35,00 | 35,00 | 35,00 | 35,00 | 35,00 | 35,00 | 35,00 | 35,00 |
| hsa-miR-1539      | YP00204682 | 35,00 | 35,00 | 35,00 | 35,00 | 35,00 | 35,00 | 35,00 | 35,00 |
| hsa-miR-663b      | YP00205985 | 28,54 | 31,37 | 27,69 | 33,66 | 28,90 | 28,29 | 29,14 | 30,38 |
| hsa-miR-1248      | YP00204253 | 35,00 | 35,00 | 35,00 | 35,00 | 35,00 | 35,00 | 35,00 | 35,00 |
| hsa-miR-889-3p    | YP00204113 | 32,02 | 35,00 | 34,64 | 33,42 | 34,80 | 35,00 | 35,00 | 35,00 |
| hsa-miR-1227-3p   | YP00204200 | 35,00 | 35,00 | 34,83 | 35,00 | 33,55 | 33,15 | 35,00 | 33,31 |
| hsa-miR-548h-5p   | YP00204777 | 35,00 | 35,00 | 35,00 | 35,00 | 35,00 | 35,00 | 35,00 | 35,00 |
| hsa-miR-1255b-5p  | YP00205878 | 35,00 | 35,00 | 35,00 | 35,00 | 35,00 | 35,00 | 35,00 | 35,00 |
| hsa-miR-330-5p    | YP00204372 | 35,00 | 35,00 | 35,00 | 35,00 | 35,00 | 35,00 | 35,00 | 35,00 |
| hsa-miR-1238-3p   | YP00204004 | 35,00 | 35,00 | 35,00 | 35,00 | 35,00 | 35,00 | 35,00 | 35,00 |
| hsa-miR-188-3p    | YP02119296 | 35,00 | 35,00 | 35,00 | 35,00 | 35,00 | 35,00 | 35,00 | 35,00 |
| hsa-miR-589-3p    | YP00206048 | 35,00 | 35,00 | 35,00 | 35,00 | 35,00 | 35,00 | 35,00 | 35,00 |
| hsa-miR-125b-2-3p | YP00204295 | 33,16 | 35,00 | 33,28 | 35,00 | 34,95 | 33,42 | 35,00 | 34,09 |
| hsa-miR-16-2-3p   | YP00204309 | 35,00 | 35,00 | 33,26 | 35,00 | 35,00 | 34,68 | 34,81 | 33,86 |
| hsa-miR-515-5p    | YP00204431 | 35,00 | 35,00 | 35,00 | 35,00 | 35,00 | 35,00 | 35,00 | 35,00 |
| hsa-miR-340-3p    | YP00204250 | 31,06 | 31,04 | 34,11 | 35,00 | 35,00 | 35,00 | 28,48 | 31,40 |
| hsa-miR-513a-3p   | YP00204597 | 35,00 | 35,00 | 35,00 | 35,00 | 35,00 | 35,00 | 35,00 | 35,00 |
| hsa-miR-34a-3p    | YP00206061 | 31,49 | 33,94 | 31,16 | 32,18 | 32,06 | 30,37 | 32,10 | 30,97 |
| hsa-miR-342-5p    | YP00204516 | 35,00 | 35,00 | 35,00 | 35,00 | 35,00 | 35,00 | 35,00 | 35,00 |
| hsa-miR-639       | YP02119298 | 35,00 | 35,00 | 35,00 | 35,00 | 35,00 | 35,00 | 35,00 | 35,00 |
| hsa-let-7i-3p     | YP00204247 | 33,01 | 35,00 | 31,21 | 35,00 | 35,00 | 32,37 | 35,00 | 33,63 |
| hsa-miR-543       | YP00204447 | 30,79 | 32,41 | 32,33 | 33,96 | 32,32 | 31,32 | 32,97 | 32,91 |
| hsa-miR-645       | YP00206076 | 35,00 | 35,00 | 35,00 | 35,00 | 34,87 | 34,34 | 35,00 | 35,00 |



|                  |            |       |       |       |       |       |       |       |       |
|------------------|------------|-------|-------|-------|-------|-------|-------|-------|-------|
| hsa-miR-218-1-3p | YP00204691 | 35,00 | 35,00 | 34,18 | 35,00 | 35,00 | 35,00 | 35,00 | 35,00 |
| hsa-miR-593-5p   | YP00204550 | 35,00 | 35,00 | 35,00 | 35,00 | 35,00 | 35,00 | 35,00 | 35,00 |
| hsa-miR-561-3p   | YP00205895 | 35,00 | 35,00 | 35,00 | 35,00 | 35,00 | 35,00 | 35,00 | 35,00 |
| hsa-miR-767-3p   | YP02119295 | 31,73 | 35,00 | 35,00 | 35,00 | 35,00 | 35,00 | 31,23 | 35,00 |
| hsa-miR-526b-3p  | YP00205984 | 35,00 | 35,00 | 35,00 | 35,00 | 35,00 | 35,00 | 35,00 | 35,00 |
| hsa-miR-24-1-5p  | YP00204357 | 34,32 | 35,00 | 34,80 | 35,00 | 35,00 | 35,00 | 35,00 | 35,00 |
| hsa-let-7b-3p    | YP00205653 | 30,99 | 33,17 | 30,89 | 33,41 | 31,46 | 30,60 | 32,25 | 31,65 |
| hsa-miR-193b-5p  | YP00204065 | 33,99 | 35,00 | 35,00 | 35,00 | 34,62 | 33,48 | 34,23 | 34,46 |
| hsa-miR-335-3p   | YP00205613 | 35,00 | 31,01 | 32,63 | 32,12 | 33,95 | 33,37 | 35,00 | 35,00 |
| hsa-miR-541-5p   | YP00204118 | 35,00 | 35,00 | 35,00 | 35,00 | 35,00 | 35,00 | 35,00 | 35,00 |
| hsa-miR-30c-1-3p | YP00205707 | 35,00 | 35,00 | 35,00 | 35,00 | 35,00 | 35,00 | 35,00 | 35,00 |
| hsa-miR-629-3p   | YP00204210 | 35,00 | 35,00 | 34,68 | 35,00 | 35,00 | 35,00 | 35,00 | 35,00 |
| hsa-miR-377-5p   | YP00205428 | 34,15 | 34,49 | 35,00 | 35,00 | 35,00 | 35,00 | 35,00 | 35,00 |
| hsa-miR-630      | YP00204392 | 35,00 | 35,00 | 35,00 | 35,00 | 35,00 | 35,00 | 35,00 | 35,00 |
| hsa-miR-548d-3p  | YP00205608 | 34,92 | 35,00 | 35,00 | 35,00 | 35,00 | 34,91 | 35,00 | 35,00 |
| hsa-miR-885-3p   | YP00204136 | 30,29 | 33,75 | 35,00 | 31,41 | 34,78 | 32,74 | 32,03 | 30,59 |
| hsa-miR-320d     | YP00205667 | 31,45 | 32,31 | 29,38 | 32,60 | 31,98 | 31,57 | 32,12 | 32,67 |
| hsa-miR-2053     | YP00204605 | 35,00 | 35,00 | 35,00 | 35,00 | 35,00 | 35,00 | 35,00 | 35,00 |
| hsa-miR-675-5p   | YP00205687 | 35,00 | 35,00 | 35,00 | 35,00 | 32,96 | 35,00 | 35,00 | 35,00 |
| hsa-miR-1252-5p  | YP00204701 | 35,00 | 35,00 | 35,00 | 35,00 | 35,00 | 35,00 | 35,00 | 35,00 |
| hsa-miR-548e-3p  | YP00206005 | 35,00 | 35,00 | 35,00 | 35,00 | 35,00 | 35,00 | 35,00 | 35,00 |
| hsa-miR-1914-5p  | YP00204672 | 34,86 | 35,00 | 35,00 | 35,00 | 35,00 | 34,40 | 35,00 | 33,71 |
| hsa-miR-513c-5p  | YP00205928 | 34,53 | 35,00 | 26,23 | 31,08 | 35,00 | 29,85 | 33,18 | 30,51 |
| hsa-miR-331-5p   | YP00204423 | 35,00 | 35,00 | 34,72 | 35,00 | 35,00 | 35,00 | 35,00 | 35,00 |
| hsa-miR-1182     | YP00204466 | 35,00 | 35,00 | 35,00 | 35,00 | 35,00 | 35,00 | 35,00 | 35,00 |
| hsa-miR-611      | YP00204041 | 35,00 | 35,00 | 35,00 | 35,00 | 35,00 | 35,00 | 35,00 | 35,00 |
| hsa-miR-1181     | YP00204050 | 35,00 | 35,00 | 35,00 | 35,00 | 34,99 | 33,68 | 35,00 | 34,05 |
| hsa-miR-638      | YP00204234 | 32,35 | 33,14 | 30,74 | 32,04 | 29,81 | 29,88 | 30,32 | 30,86 |
| hsa-miR-515-3p   | YP00204651 | 35,00 | 35,00 | 35,00 | 35,00 | 35,00 | 35,00 | 35,00 | 35,00 |
| hsa-miR-650      | YP00204233 | 35,00 | 35,00 | 35,00 | 35,00 | 35,00 | 35,00 | 35,00 | 33,91 |
| hsa-miR-1178-3p  | YP00205870 | 35,00 | 35,00 | 35,00 | 35,00 | 35,00 | 35,00 | 35,00 | 35,00 |
| hsa-miR-600      | YP00204076 | 35,00 | 35,00 | 35,00 | 35,00 | 35,00 | 35,00 | 35,00 | 35,00 |
| hsa-miR-599      | YP00205908 | 35,00 | 35,00 | 35,00 | 35,00 | 35,00 | 35,00 | 35,00 | 35,00 |
| hsa-miR-520g-3p  | YP00204055 | 35,00 | 35,00 | 35,00 | 35,00 | 35,00 | 35,00 | 35,00 | 35,00 |
| hsa-miR-564      | YP00205925 | 35,00 | 35,00 | 35,00 | 35,00 | 35,00 | 35,00 | 35,00 | 35,00 |
| hsa-miR-132-5p   | YP00204552 | 32,56 | 35,00 | 34,03 | 33,45 | 35,00 | 35,00 | 35,00 | 35,00 |
| hsa-miR-577      | YP00205998 | 35,00 | 35,00 | 35,00 | 35,00 | 35,00 | 35,00 | 35,00 | 35,00 |
| hsa-miR-1911-3p  | YP00204599 | 35,00 | 35,00 | 31,70 | 35,00 | 33,03 | 32,37 | 32,59 | 33,25 |
| hsa-let-7f-2-3p  | YP00204095 | 31,76 | 34,41 | 32,41 | 35,00 | 35,00 | 32,49 | 35,00 | 32,40 |
| hsa-miR-155-3p   | YP00204000 | 34,80 | 35,00 | 35,00 | 35,00 | 35,00 | 35,00 | 35,00 | 35,00 |
| hsa-miR-105-3p   | YP00204193 | 35,00 | 35,00 | 35,00 | 35,00 | 35,00 | 35,00 | 35,00 | 35,00 |
| hsa-miR-486-3p   | YP00204107 | 35,00 | 35,00 | 35,00 | 35,00 | 35,00 | 35,00 | 35,00 | 35,00 |
| hsa-miR-320b     | YP02119299 | 28,69 | 30,94 | 29,11 | 30,02 | 30,24 | 29,66 | 31,22 | 31,14 |
| hsa-miR-296-3p   | YP00204393 | 35,00 | 35,00 | 35,00 | 35,00 | 35,00 | 35,00 | 35,00 | 35,00 |
| hsa-miR-7-2-3p   | YP00204581 | 35,00 | 35,00 | 35,00 | 35,00 | 35,00 | 35,00 | 35,00 | 35,00 |
| hsa-miR-550a*    | YP00204795 | 34,08 | 34,64 | 35,00 | 35,00 | 35,00 | 35,00 | 35,00 | 35,00 |
